# Supplementary material for: Solution-phase and solid-phase sequential, selective modification of side chains in KDYWEC and KDYWE as models for usage in single-molecule protein sequencing
Source: Royal Society of Chemistry journal article supplement (doi:10.1039/c6nj02932a), 2016-11-18
Supplement: c6nj02932a1.pdf [file c6nj02932a1.pdf]

## Electronic Supporting Information

### **Solution-phase and solid-phase sequential, selective modification of side chains in KDYWEC and KDYWE as models for usage in single-molecule protein sequencing**

Erik T. Hernandez,<sup>a</sup> Jagannath Swaminathan<sup>b</sup> Edward M. Marcotte<sup>b</sup> and Eric V. Anslyn<sup>\*a</sup>

<sup>a</sup> *Correspondence to: Eric V. Anslyn, Department of Chemistry, University of Texas at Austin, Austin, TX, 78712-1224, USA. E-mail: anslyn@austin.utexas.edu.*

<sup>b</sup> *Center for Systems and Synthetic Biology, Department of Molecular Biosciences, Institute for Cellular and Molecular Biology, University of Texas at Austin.*

November 2016

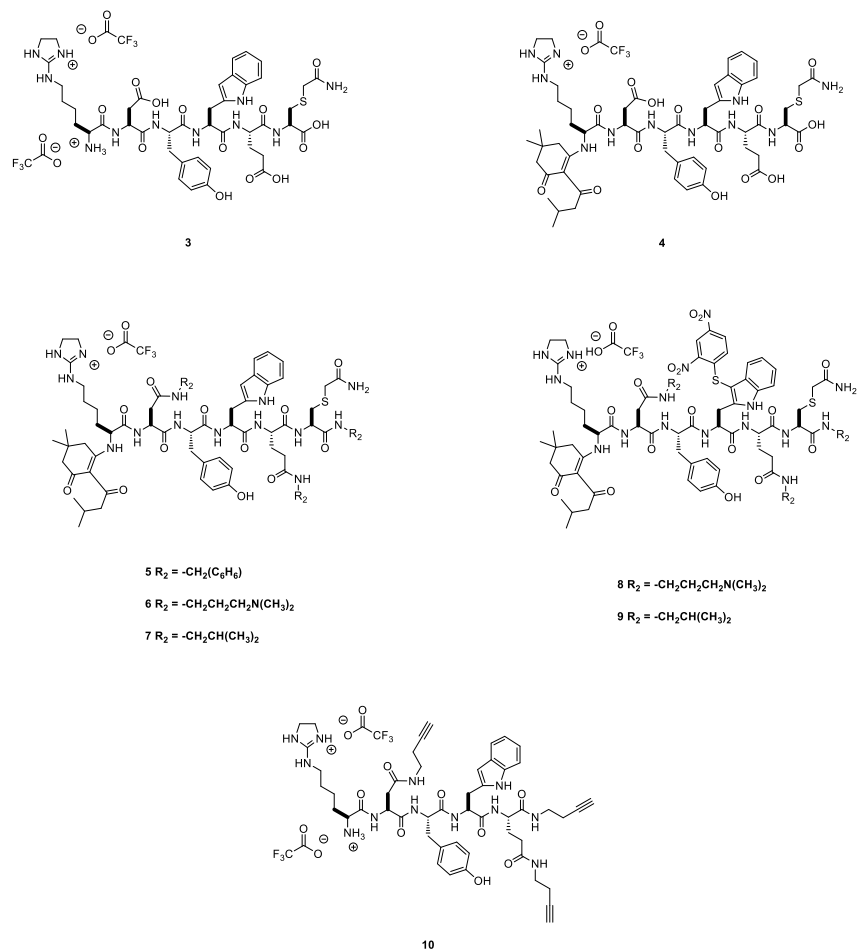

(SI-Figure 1). KDYWE and KDYWE derivatives.

## Preparation of Modifying Reagents

*2-Methoxy-4,5-dihydro-1H-imidazole* was prepared following a literature protocol. (Peters EC, Horn DM, Tully DC, Brock A. A novel multifunctional modifying reagent for enhanced protein characterization with mass spectrometry. *Rapid Commun. Mass Spectrom.* 2001; **15**: 2387-2392.)

*1-(4,4-dimethyl-2,6-dioxocyclohexylidene)-3-methylbutyl diethyl phosphate* was prepared by dissolving of 2-(3-methylbutyryl)-5,5-dimethyl-1,3-cyclohexandione (17  $\mu$ mole) in 0.5 ml of dry MeCN under argon. Solution was placed in ice bath. DIPEA (20  $\mu$ mole) was introduced, followed by slow introduction of diethylchlorophosphate (22  $\mu$ mole). Reaction was stirred

overnight at RT. Yield: quantitative.  $^1\text{H}$  NMR (500 MHz, Acetonitrile- $d_3$ )  $\delta$  4.12 (dq,  $J = 8.3$ , 7.1 Hz, 4H), 2.67 (d,  $J = 1.6$  Hz, 2H), 2.45 (d,  $J = 6.8$  Hz, 2H), 2.26 (s, 2H), 2.09 – 2.00 (m, 1H), 1.30 – 1.27 (m, 6H), 1.06 (s, 6H), 0.89 (d,  $J = 6.7$  Hz, 6H).  $^{13}\text{C}$  NMR (126 MHz,  $\text{cd}_3\text{cn}$ )  $\delta$  197.70, 164.75, 66.22, 66.17, 53.74, 51.03, 42.23, 33.22, 28.06, 24.81, 22.92, 16.42, 16.37. HR-res MS: found  $m/z$  383.15970, calcd. 383.15940 ( $\text{M}+\text{Na}^+$ ) $^+$ ; found  $m/z$  359.16290, calcd. 359.16290 ( $\text{M}-\text{H}$ ) $^-$  (Adapted from Zhang, H. A process for the preparation of the intermediate of  $\beta$ -methyl carbapenem. WO 2007104219 A1, September 20, 2007.)

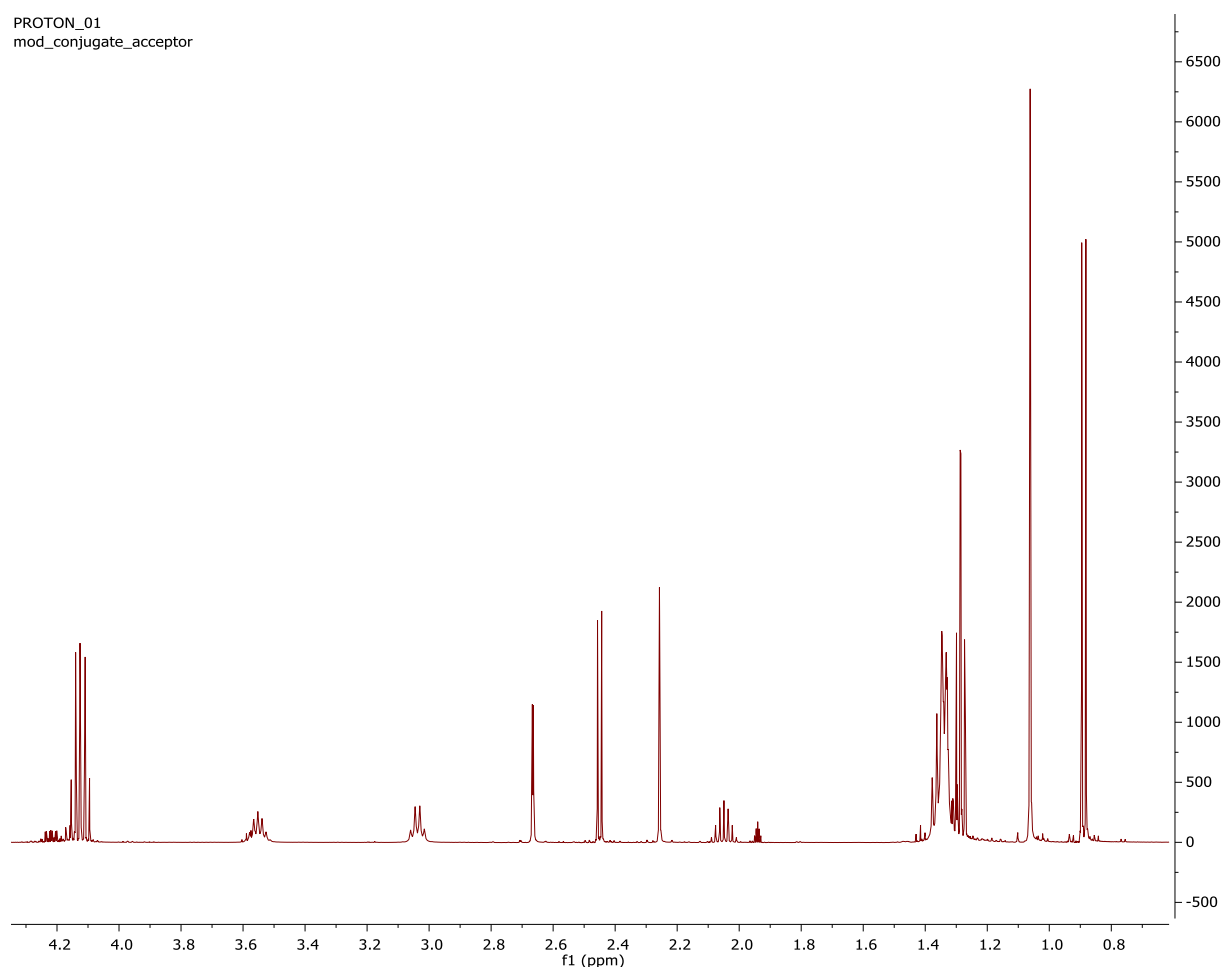

**SI-Figure 2.**  $^1\text{H}$  Proton NMR of 5,5-dimethyl-2-(3-methylbutanoyl)-3-oxocyclohex-1-en-1-yl diethyl phosphate (Phos-DOD).

CARBON\_01  
mod\_conjugate\_acceptor

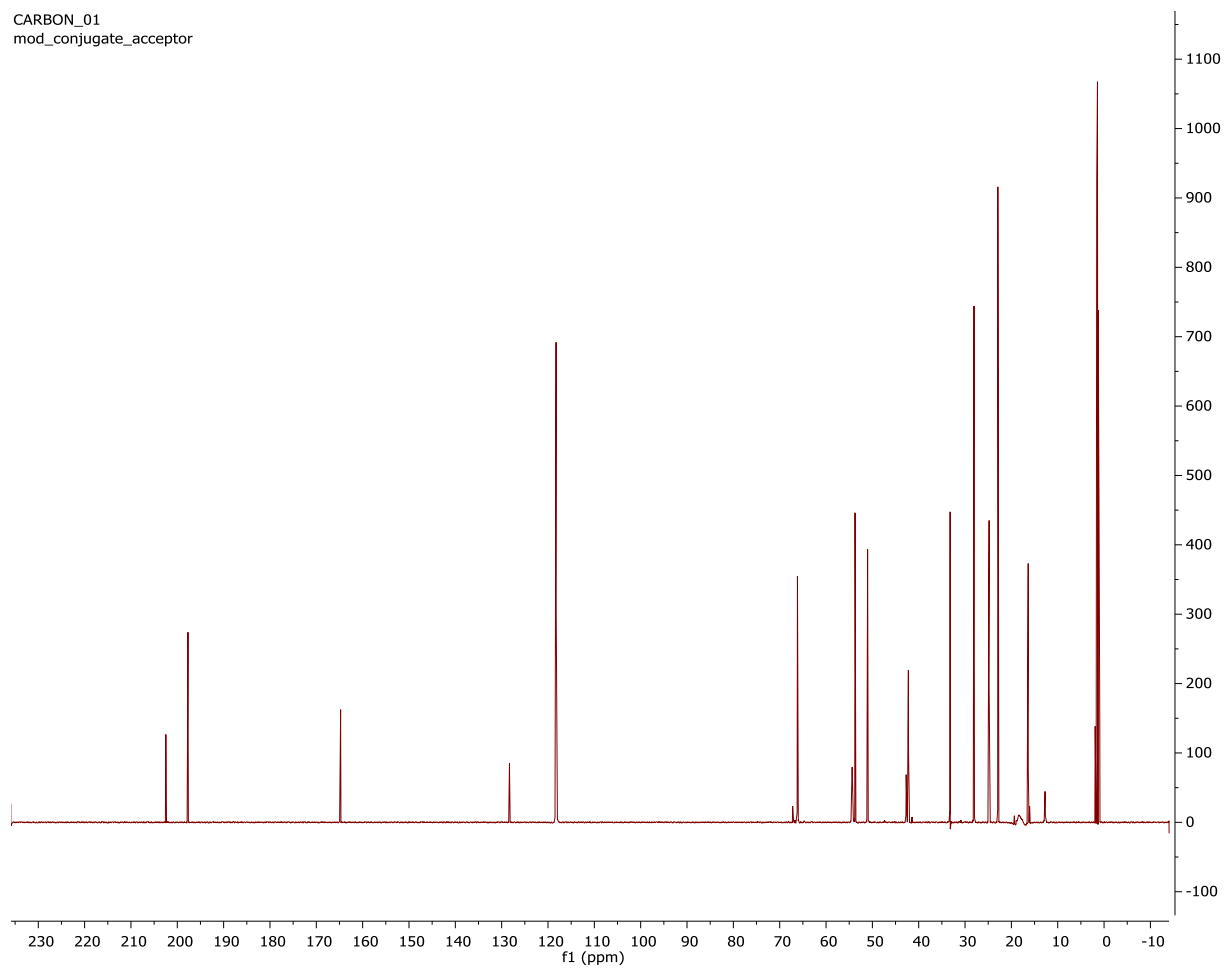

**SI-Figure 3.** 13 Carbon NMR of phos-DOD.

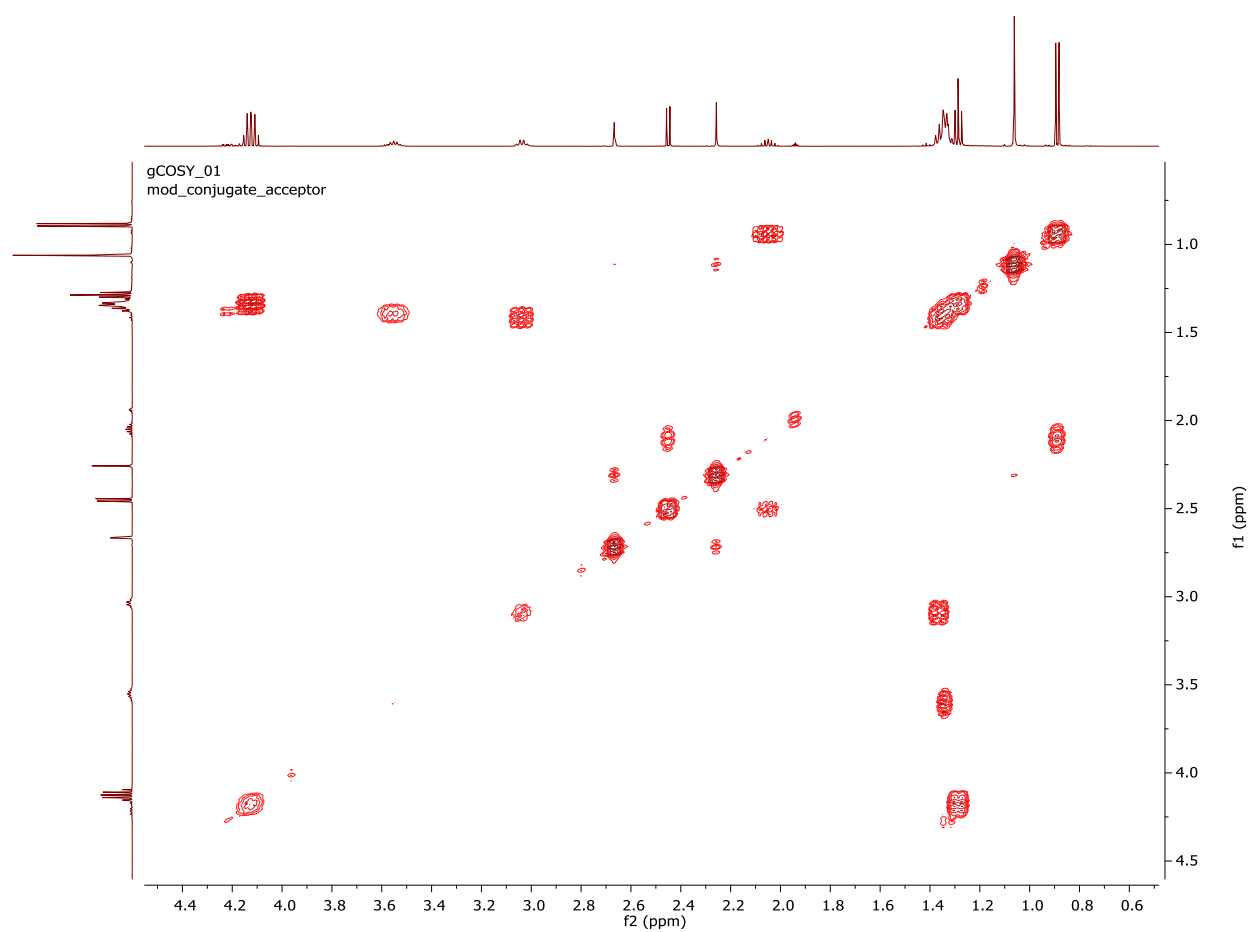

**SI-Figure 4.** COSY NMR of phos-DOD.

(a)

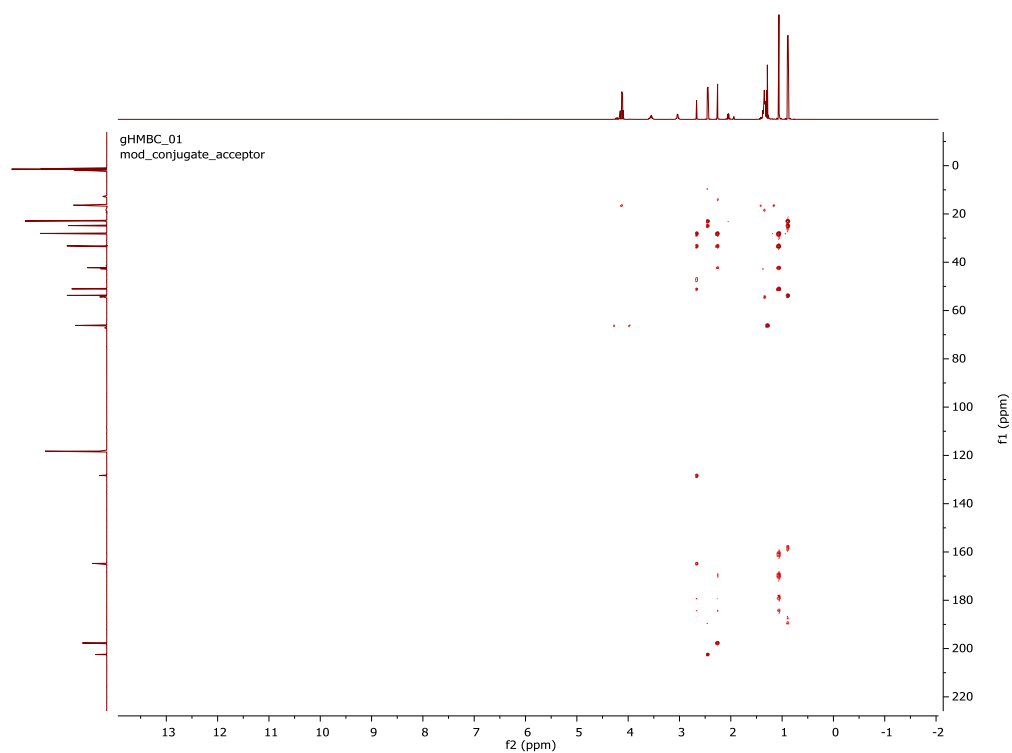

(b)

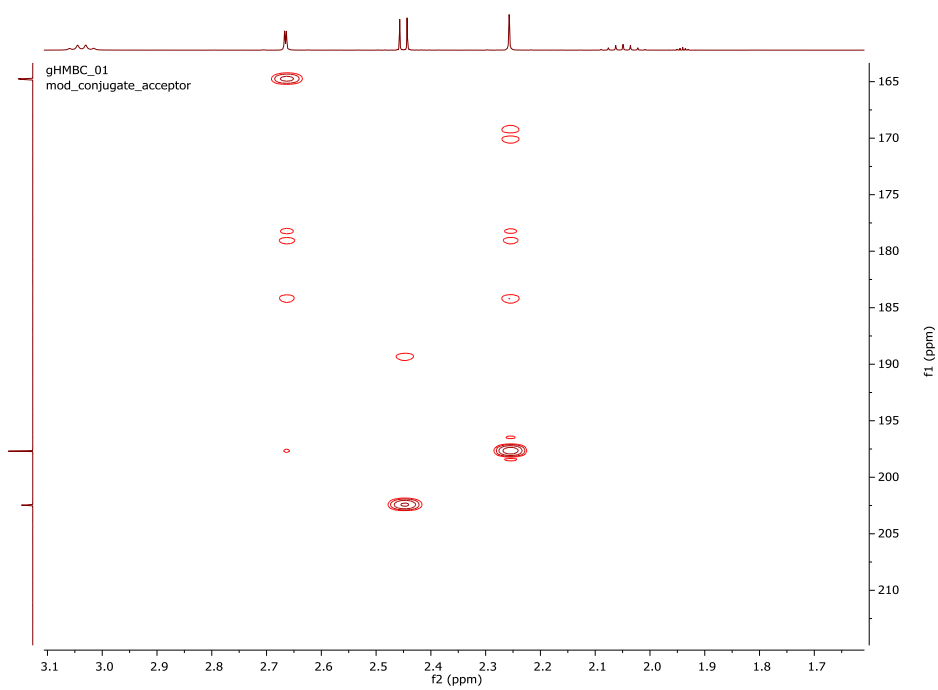

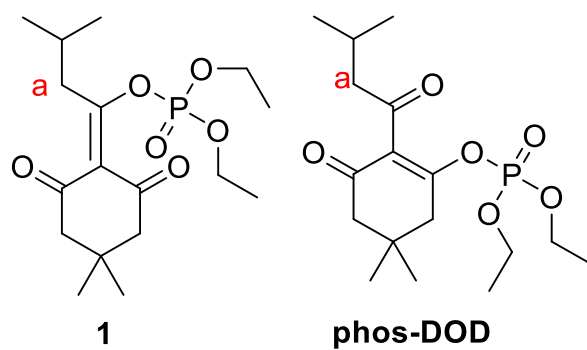

**SI-Figure 5.**(a) HMBC NMR of phos-DOD. (b) Region shown demonstrated doublet attributed to position **a** in phos-DOD correlated with a carbon in the carbonyl region, instead of an alkene as shown in **SI-1**.

## Target Compound Screening Report

|                                                             |                                             |                                         |
|-------------------------------------------------------------|---------------------------------------------|-----------------------------------------|
| <b>Data File</b> MSF15-4639(56_UG_001_20151026)_hrESIpos1.d | <b>Sample Name</b> 4639(56_UG_001_20151026) | <b>Comment</b> 4639(56_UG_001_20151026) |
| <b>Position</b> P1-B4                                       | <b>Instrument Name</b> Instrument 1         | <b>User Name</b>                        |
| <b>Acq Method</b> pos.m                                     | <b>Acquired Time</b> 10/27/2015 2:34:51 PM  | <b>DA Method</b> Ian.m                  |

MS Zoomed Spectrum

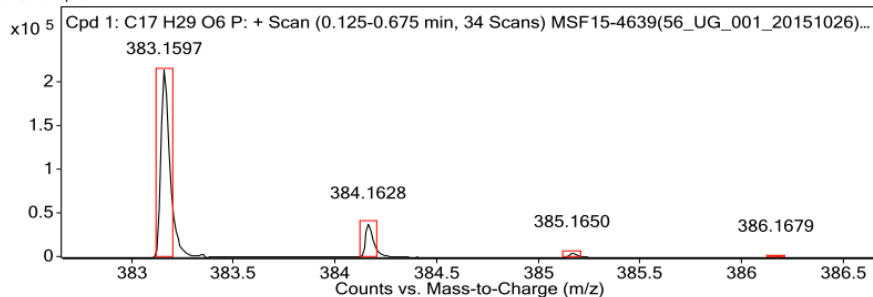

MS Spectrum Peak List

| Obs. m/z  | Calc. m/z | Charge | Abund      | Formula                                          | Ion/Isotope | Ygt Mass Error (ppm) |
|-----------|-----------|--------|------------|--------------------------------------------------|-------------|----------------------|
| 130.15910 |           |        | 2418499.71 |                                                  |             |                      |
| 383.15970 | 383.15940 | 1      | 216028.95  | C <sub>17</sub> H <sub>29</sub> O <sub>6</sub> P | (M+Na)+     | -0.88                |
| 384.16280 | 384.16280 | 1      | 38420.76   | C <sub>17</sub> H <sub>29</sub> O <sub>6</sub> P | (M+Na)+     | -0.04                |
| 385.16500 | 385.16510 | 1      | 5741.21    | C <sub>17</sub> H <sub>29</sub> O <sub>6</sub> P | (M+Na)+     | 0.45                 |
| 386.16790 | 386.16780 | 1      | 640.61     | C <sub>17</sub> H <sub>29</sub> O <sub>6</sub> P | (M+Na)+     | -0.22                |

--- End Of Report ---

## Target Compound Screening Report

|                                                             |                                             |                                         |
|-------------------------------------------------------------|---------------------------------------------|-----------------------------------------|
| <b>Data File</b> MSF15-4639(56_UG_001_20151026)_hrESIneg1.d | <b>Sample Name</b> 4639(56_UG_001_20151026) | <b>Comment</b> 4639(56_UG_001_20151026) |
| <b>Position</b> P1-B4                                       | <b>Instrument Name</b> Instrument 1         | <b>User Name</b>                        |
| <b>Acq Method</b> neg.m                                     | <b>Acquired Time</b> 10/27/2015 2:49:13 PM  | <b>DA Method</b> Ian.m                  |

MS Zoomed Spectrum

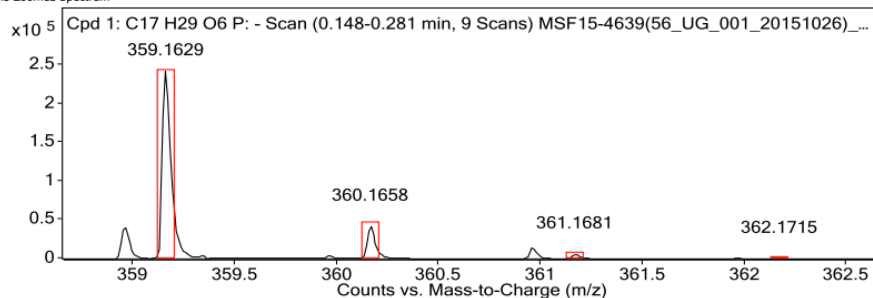

MS Spectrum Peak List

| Obs. m/z  | Calc. m/z | Charge | Abund     | Formula                                          | Ion/Isotope | Ygt Mass Error (ppm) |
|-----------|-----------|--------|-----------|--------------------------------------------------|-------------|----------------------|
| 331.13190 |           |        | 613191.49 |                                                  |             |                      |
| 359.16290 | 359.16290 | 1      | 242412.53 | C <sub>17</sub> H <sub>29</sub> O <sub>6</sub> P | (M-H)-      | 0.09                 |
| 360.16580 | 360.16630 | 1      | 42336.24  | C <sub>17</sub> H <sub>29</sub> O <sub>6</sub> P | (M-H)-      | 1.43                 |
| 361.16810 | 361.16860 | 1      | 6543.88   | C <sub>17</sub> H <sub>29</sub> O <sub>6</sub> P | (M-H)-      | 1.49                 |
| 362.17150 | 362.17130 | 1      | 676.43    | C <sub>17</sub> H <sub>29</sub> O <sub>6</sub> P | (M-H)-      | -0.48                |

--- End Of Report ---

SI-Figure 6. High-resolution mass spectrometry data for phos-DOD.



## Target Compound Screening Report

|            |                                   |                 |                      |           |           |
|------------|-----------------------------------|-----------------|----------------------|-----------|-----------|
| Data File  | MSF14-2528(CK_KDYWEC)_hrESIpos2.d | Sample Name     | 2528                 | Comment   | CK_KDYWEC |
| Position   | P1-B6                             | Instrument Name | Instrument 1         | User Name |           |
| Acq Method | pos.m                             | Acquired Time   | 5/13/2014 4:41:31 PM | DA Method | Ian.m     |

MS Zoomed Spectrum

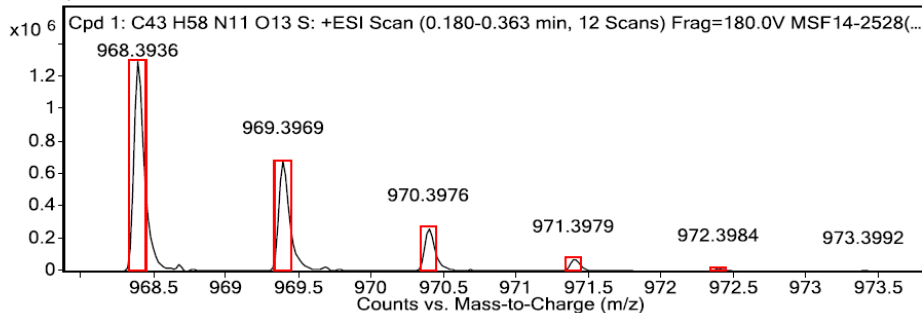

MS Spectrum Peak List

| Obs. m/z  | Calc. m/z | Charge | Abund      | Formula       | Ion/Isotope | Tgt Mass Error (ppm) |
|-----------|-----------|--------|------------|---------------|-------------|----------------------|
| 968.39360 | 968.39310 | 1      | 1301931.29 | C43H58N11O13S | M+          | -0.57                |
| 969.39690 | 969.39590 | 1      | 685577.67  | C43H58N11O13S | M+          | -1.02                |
| 970.39760 | 970.39640 | 1      | 267939.09  | C43H58N11O13S | M+          | -1.16                |
| 971.39790 | 971.39750 | 1      | 75230.14   | C43H58N11O13S | M+          | -0.39                |
| 972.39840 | 972.39880 | 1      | 19090.08   | C43H58N11O13S | M+          | 0.4                  |
| 973.39920 | 973.40040 | 1      | 3462.31    | C43H58N11O13S | M+          | 1.16                 |
| 974.40160 | 974.40210 | 1      | 857.75     | C43H58N11O13S | M+          | 0.51                 |

--- End Of Report ---

## Target Compound Screening Report

|            |                                   |                 |                      |           |           |
|------------|-----------------------------------|-----------------|----------------------|-----------|-----------|
| Data File  | MSF14-2528(CK_KDYWEC)_hrESIneg1.d | Sample Name     | 2528                 | Comment   | CK_KDYWEC |
| Position   | P1-B6                             | Instrument Name | Instrument 1         | User Name |           |
| Acq Method | neg.m                             | Acquired Time   | 5/13/2014 4:46:23 PM | DA Method | Ian.m     |

MS Zoomed Spectrum

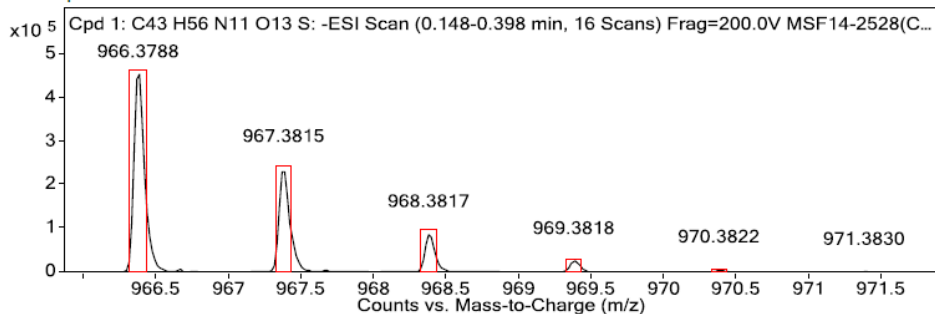

MS Spectrum Peak List

| Obs. m/z  | Calc. m/z | Charge | Abund     | Formula       | Ion/Isotope | Tgt Mass Error (ppm) |
|-----------|-----------|--------|-----------|---------------|-------------|----------------------|
| 268.95430 |           |        | 679714.55 |               |             |                      |
| 966.37880 | 966.37850 | 1      | 463032.74 | C43H56N11O13S | M-          | -0.27                |
| 967.38150 | 967.38140 | 1      | 237486.19 | C43H56N11O13S | M-          | -0.15                |
| 968.38170 | 968.38190 | 1      | 88069.86  | C43H56N11O13S | M-          | 0.24                 |
| 969.38180 | 969.38290 | 1      | 26133.49  | C43H56N11O13S | M-          | 1.16                 |
| 970.38220 | 970.38420 | 1      | 6741.97   | C43H56N11O13S | M-          | 2.05                 |
| 971.38300 | 971.38580 | 1      | 1626.65   | C43H56N11O13S | M-          | 2.89                 |
| 972.38350 | 972.38750 | 1      | 542.09    | C43H56N11O13S | M-          | 4.18                 |

--- End Of Report ---

**SI-Figure 7.** High resolution mass spectrometry data for peptide 3.

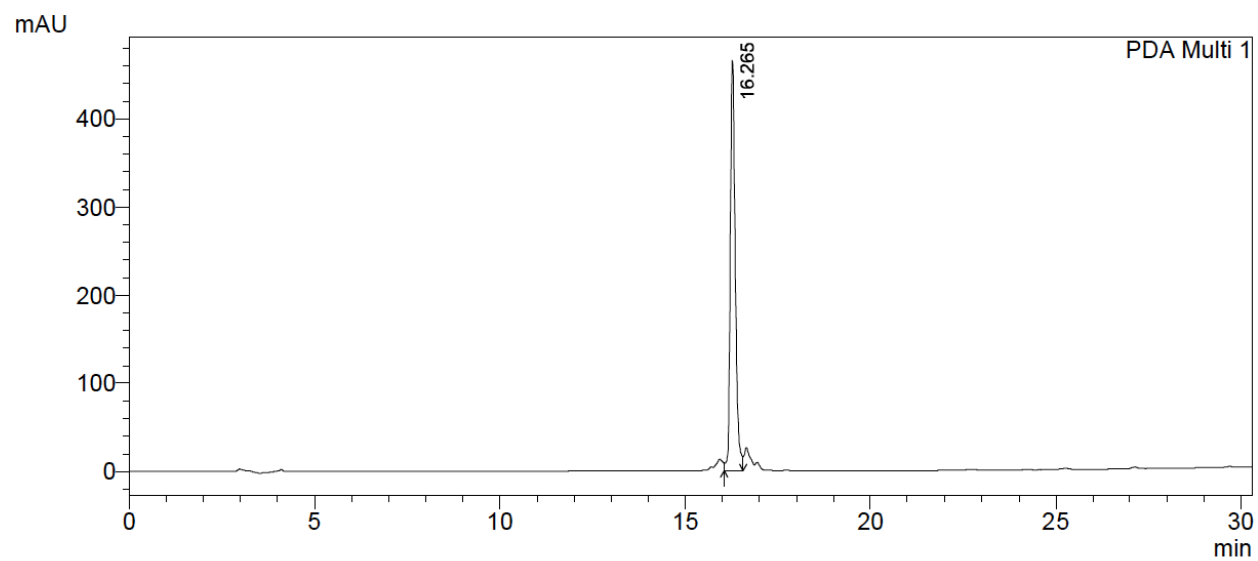

1 Det.A Ch1/365nm - 480nm  
2 PDA Multi 1/254nm 4nm

**SI-Figure 8.** HPLC trace for purified peptide **3**.

#### **Desalting of peptide 4**

Crude peptide was prepared for preparative HPLC using an Extract Clean<sup>TM</sup> C<sub>18</sub> 500 mg /4 ml solid phase extraction column. Column was flushed with 6 ml of 90/10 MeOH/H<sub>2</sub>O with 0.1% TFA (v/v/v) at a flow rate of 1 drop sec<sup>-1</sup> (RT), followed by equilibration with 3 ml of 0.1% TFA in water (v/v) at a flow rate of 1 drop sec<sup>-1</sup>. Acidified peptide solution was loaded on the column 1 drop sec<sup>-1</sup> (RT). Peptide was eluted with 1 ml 5% MeOH/Water with 0.1% TFA (v/v/v). Residually bound peptide was eluted with 50/50 MeCN/Water with 0.1% TFA (v/v/v).

## Target Compound Screening Report

|            |                                    |                 |                      |           |            |
|------------|------------------------------------|-----------------|----------------------|-----------|------------|
| Data File  | MSF14-2529(nCK_KDYWEC)_hrESIpos1.d | Sample Name     | 2529                 | Comment   | nCK_KDYWEC |
| Position   | P1-B7                              | Instrument Name | Instrument 1         | User Name |            |
| Acq Method | pos.m                              | Acquired Time   | 5/13/2014 5:03:41 PM | DA Method | Ian.m      |

MS Zoomed Spectrum

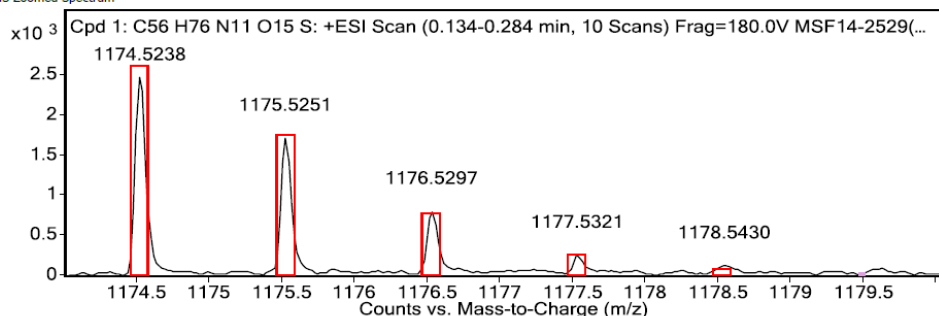

MS Spectrum Peak List

| Obs. m/z   | Calc. m/z  | Charge | Abund     | Formula       | Ion/Isotope | Tgt Mass Error (ppm) |
|------------|------------|--------|-----------|---------------|-------------|----------------------|
| 313.05800  |            |        | 819276.72 |               |             |                      |
| 1174.52380 | 1174.52380 | 1      | 2515.13   | C56H76N11O15S | M+          | -0.01                |
| 1175.52510 | 1175.52670 | 1      | 1723.84   | C56H76N11O15S | M+          | 1.4                  |
| 1176.52970 | 1176.52800 | 1      | 810.08    | C56H76N11O15S | M+          | -1.48                |
| 1177.53210 | 1177.52930 | 1      | 264.74    | C56H76N11O15S | M+          | -2.4                 |
| 1178.54300 | 1178.53070 | 1      | 131.04    | C56H76N11O15S | M+          | -10.46               |

--- End Of Report ---

## Target Compound Screening Report

|            |                                    |                 |                      |           |            |
|------------|------------------------------------|-----------------|----------------------|-----------|------------|
| Data File  | MSF14-2529(nCK_KDYWEC)_hrESIneg1.d | Sample Name     | 2529                 | Comment   | nCK_KDYWEC |
| Position   | P1-B7                              | Instrument Name | Instrument 1         | User Name |            |
| Acq Method | neg.m                              | Acquired Time   | 5/13/2014 5:10:44 PM | DA Method | Ian.m      |

MS Zoomed Spectrum

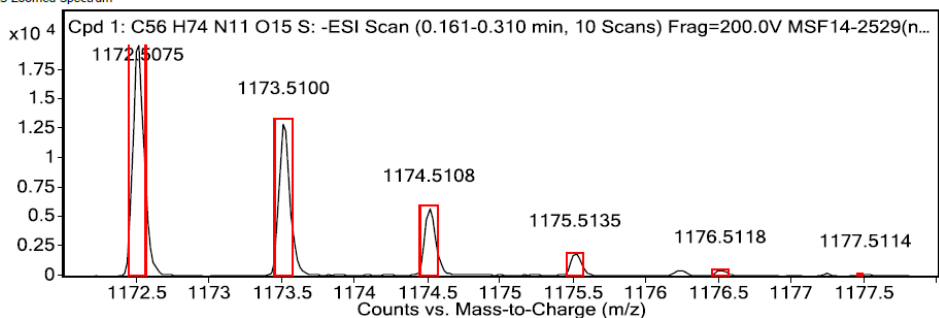

MS Spectrum Peak List

| Obs. m/z   | Calc. m/z  | Charge | Abund     | Formula       | Ion/Isotope | Tgt Mass Error (ppm) |
|------------|------------|--------|-----------|---------------|-------------|----------------------|
| 585.75120  |            |        | 654506.35 |               |             |                      |
| 1172.50750 | 1172.50920 | 1      | 20019.71  | C56H74N11O15S | M-          | 1.46                 |
| 1173.51000 | 1173.51220 | 1      | 13205.15  | C56H74N11O15S | M-          | 1.84                 |
| 1174.51080 | 1174.51340 | 1      | 5758.11   | C56H74N11O15S | M-          | 2.2                  |
| 1175.51350 | 1175.51470 | 1      | 1930.16   | C56H74N11O15S | M-          | 1.04                 |
| 1176.51180 | 1176.51610 | 1      | 546.85    | C56H74N11O15S | M-          | 3.69                 |
| 1177.51140 | 1177.51780 | 1      | 198.53    | C56H74N11O15S | M-          | 5.43                 |

--- End Of Report ---

SI-Figure 9. High resolution mass spectrometry data for peptide 4.

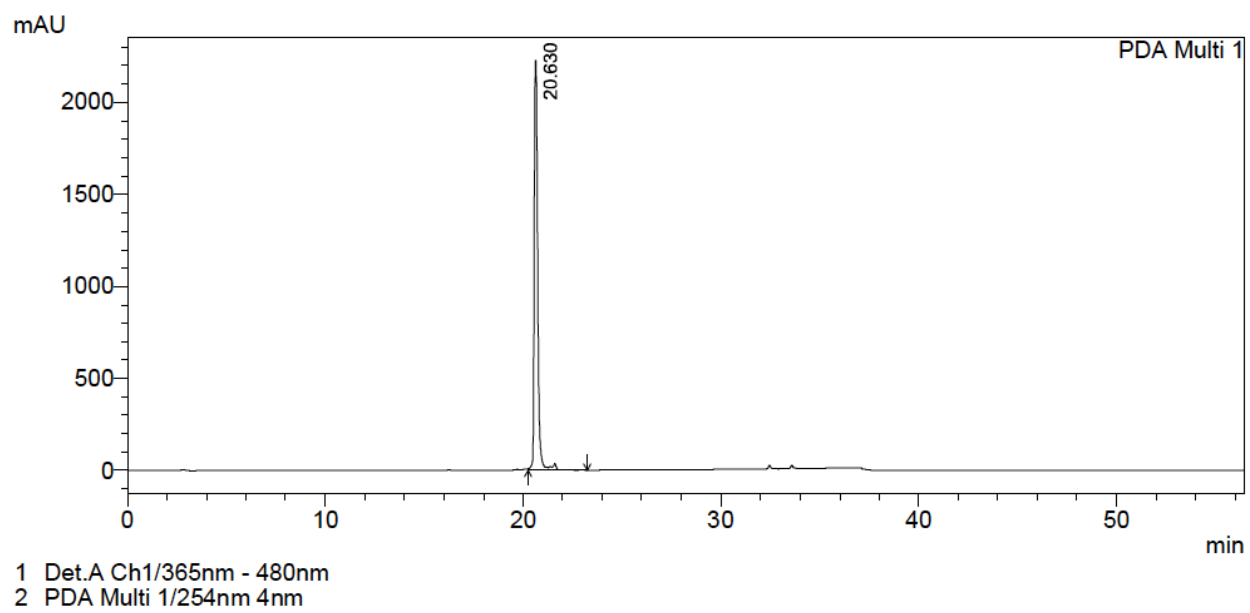

**SI-Figure 10.** HPLC trace for purified peptide 4.

## Target Compound Screening Report

|            |                                       |                 |                      |           |               |
|------------|---------------------------------------|-----------------|----------------------|-----------|---------------|
| Data File  | MSF14-2530(nCKDE_KDYWECC)_hrESIpos1.d | Sample Name     | 2530                 | Comment   | nCKDE_KDYWECC |
| Position   | P1-B8                                 | Instrument Name | Instrument 1         | User Name |               |
| Acq Method | pos.m                                 | Acquired Time   | 5/13/2014 5:22:11 PM | DA Method | Ian.m         |

MS Zoomed Spectrum

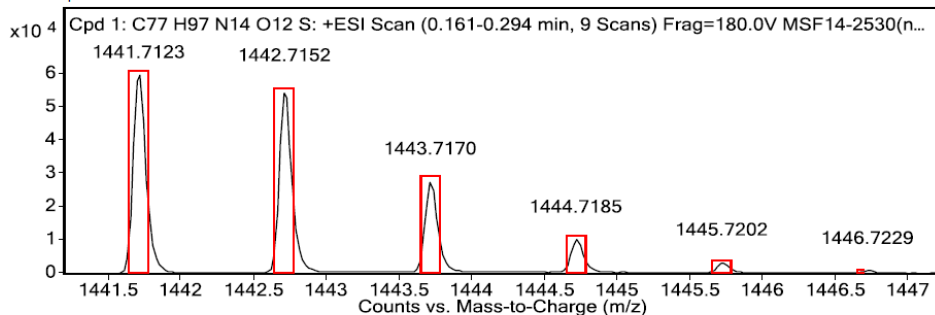

MS Spectrum Peak List

| Obs. m/z   | Calc. m/z  | Charge | Abund     | Formula       | Ion/Isotope | Tgt Mass Error (ppm) |
|------------|------------|--------|-----------|---------------|-------------|----------------------|
| 732.35260  |            |        | 923156.33 |               |             |                      |
| 1441.71230 | 1441.71260 | 1      | 61023.95  | C77H97N14O12S | M+          | 0.19                 |
| 1442.71520 | 1442.71560 | 1      | 55993.15  | C77H97N14O12S | M+          | 0.23                 |
| 1443.71700 | 1443.71750 | 1      | 27812.39  | C77H97N14O12S | M+          | 0.33                 |
| 1444.71850 | 1444.71910 | 1      | 10276.71  | C77H97N14O12S | M+          | 0.43                 |
| 1445.72020 | 1445.72070 | 1      | 3357.35   | C77H97N14O12S | M+          | 0.33                 |
| 1446.72290 | 1446.72240 | 1      | 809.52    | C77H97N14O12S | M+          | -0.34                |
| 1447.71640 | 1447.72430 | 1      | 250.93    | C77H97N14O12S | M+          | 5.4                  |
| 1448.72660 | 1448.72620 | 1      | 91.34     | C77H97N14O12S | M+          | -0.28                |

--- End Of Report ---

## Target Compound Screening Report

|            |                                       |                 |                      |           |               |
|------------|---------------------------------------|-----------------|----------------------|-----------|---------------|
| Data File  | MSF14-2530(nCKDE_KDYWECC)_hrESIneg1.d | Sample Name     | 2530                 | Comment   | nCKDE_KDYWECC |
| Position   | P1-B8                                 | Instrument Name | Instrument 1         | User Name |               |
| Acq Method | neg.m                                 | Acquired Time   | 5/13/2014 5:26:03 PM | DA Method | Ian.m         |

MS Zoomed Spectrum

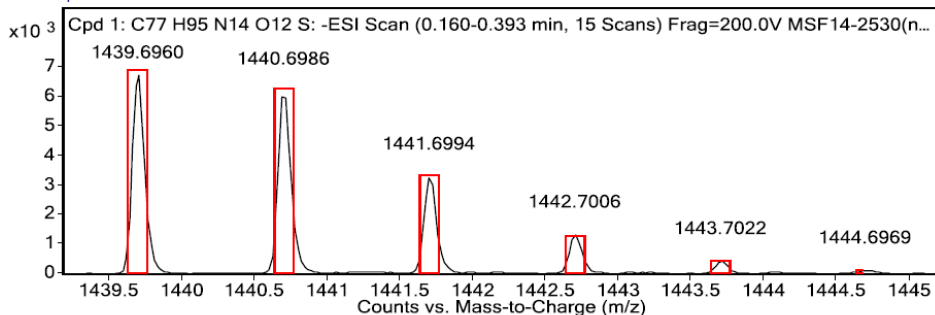

MS Spectrum Peak List

| Obs. m/z   | Calc. m/z  | Charge | Abund    | Formula       | Ion/Isotope | Tgt Mass Error (ppm) |
|------------|------------|--------|----------|---------------|-------------|----------------------|
| 248.96040  |            |        | 90929.08 |               |             |                      |
| 1439.69600 | 1439.69800 | 1      | 6802.97  | C77H95N14O12S | M-          | 1.39                 |
| 1440.69860 | 1440.70100 | 1      | 6190.92  | C77H95N14O12S | M-          | 1.67                 |
| 1441.69940 | 1441.70300 | 1      | 3303.65  | C77H95N14O12S | M-          | 2.5                  |
| 1442.70060 | 1442.70460 | 1      | 1334.91  | C77H95N14O12S | M-          | 2.75                 |
| 1443.70220 | 1443.70620 | 1      | 434.08   | C77H95N14O12S | M-          | 2.74                 |
| 1444.69690 | 1444.70790 | 1      | 119.82   | C77H95N14O12S | M-          | 7.57                 |
| 1445.72040 | 1445.70970 | 1      | 35.77    | C77H95N14O12S | M-          | -7.43                |

--- End Of Report ---

**SI-Figure 11.** High resolution mass spectrometry data for peptide 5.

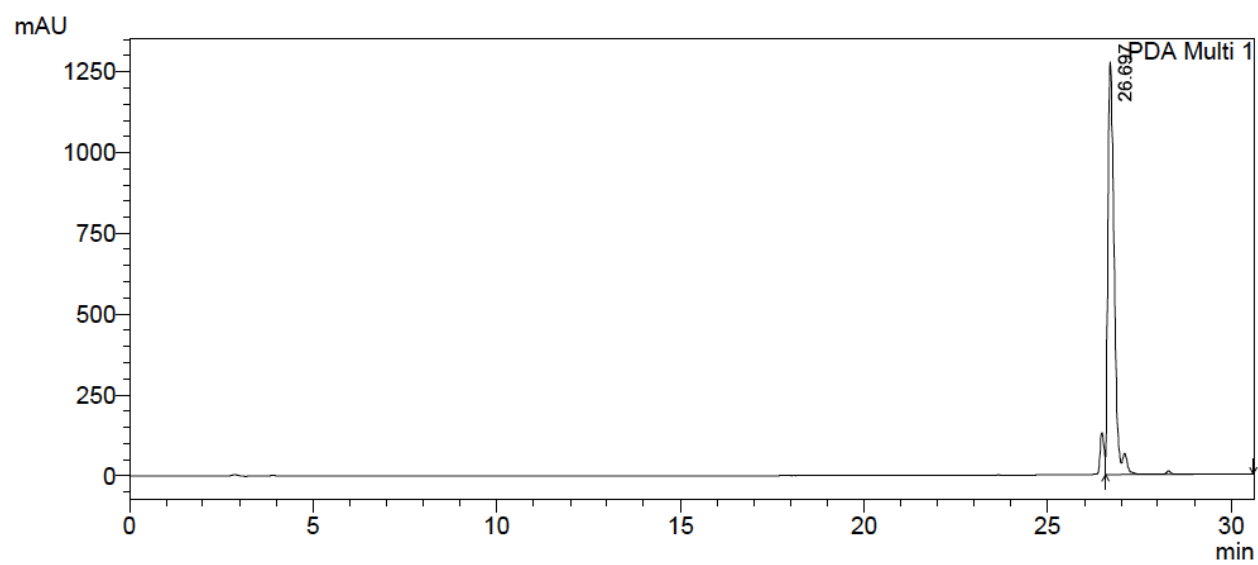

1 Det.A Ch1/365nm - 480nm  
2 PDA Multi 1/254nm 4nm

**SI-Figure 12.** HPLC trace for purified peptide 5.

## Target Compound Screening Report

|            |                                         |                 |                       |
|------------|-----------------------------------------|-----------------|-----------------------|
| Data File  | MSF14-2423(nCKDE_KDYWECC_b)_hrESIpos2.d | Sample Name     | 2423(nCKDE_KDYWECC_b) |
| Position   | P1-F1                                   | Instrument Name | Instrument 1          |
| Acq Method | pos_column_20min.m                      | Acquired Time   | 6/25/2014 11:55:56 AM |
|            |                                         | Comment         | 2423(nCKDE_KDYWECC_b) |
|            |                                         | User Name       | Ian.m                 |
|            |                                         | DA Method       | Ian.m                 |

MS Zoomed Spectrum

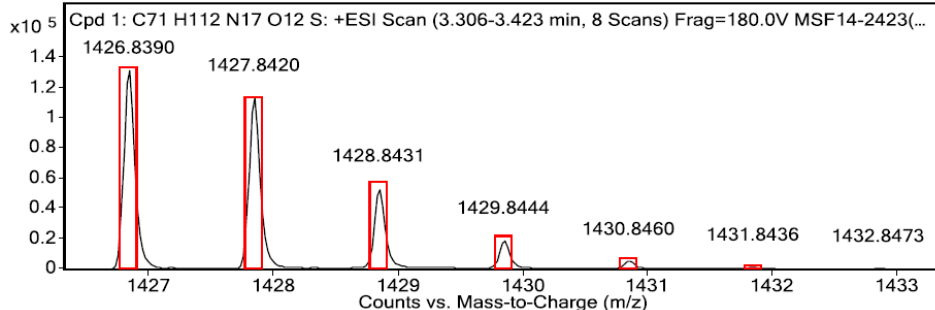

MS Spectrum Peak List

| Obs. m/z   | Calc. m/z  | Charge | Abund     | Formula        | Ion/Isotope | Tgt Mass Error (ppm) |
|------------|------------|--------|-----------|----------------|-------------|----------------------|
| 357.46650  | 2350276.17 |        |           |                |             |                      |
| 1426.83900 | 1426.83920 | 1      | 132784.34 | C71H112N17O12S | M+          | 0.1                  |
| 1427.84200 | 1427.84210 | 1      | 113609.25 | C71H112N17O12S | M+          | 0.05                 |
| 1428.84310 | 1428.84380 | 1      | 53501.04  | C71H112N17O12S | M+          | 0.53                 |
| 1429.84440 | 1429.84530 | 1      | 18949.68  | C71H112N17O12S | M+          | 0.63                 |
| 1430.84600 | 1430.84680 | 1      | 4918.58   | C71H112N17O12S | M+          | 0.58                 |
| 1431.84360 | 1431.84840 | 1      | 1160.52   | C71H112N17O12S | M+          | 3.34                 |
| 1432.84730 | 1432.85020 | 1      | 271.57    | C71H112N17O12S | M+          | 2                    |
| 1433.85390 | 1433.85210 | 1      | 86.89     | C71H112N17O12S | M+          | -1.24                |

--- End Of Report ---

**SI-Figure 13.** High resolution mass spectrometry data for peptide 6.

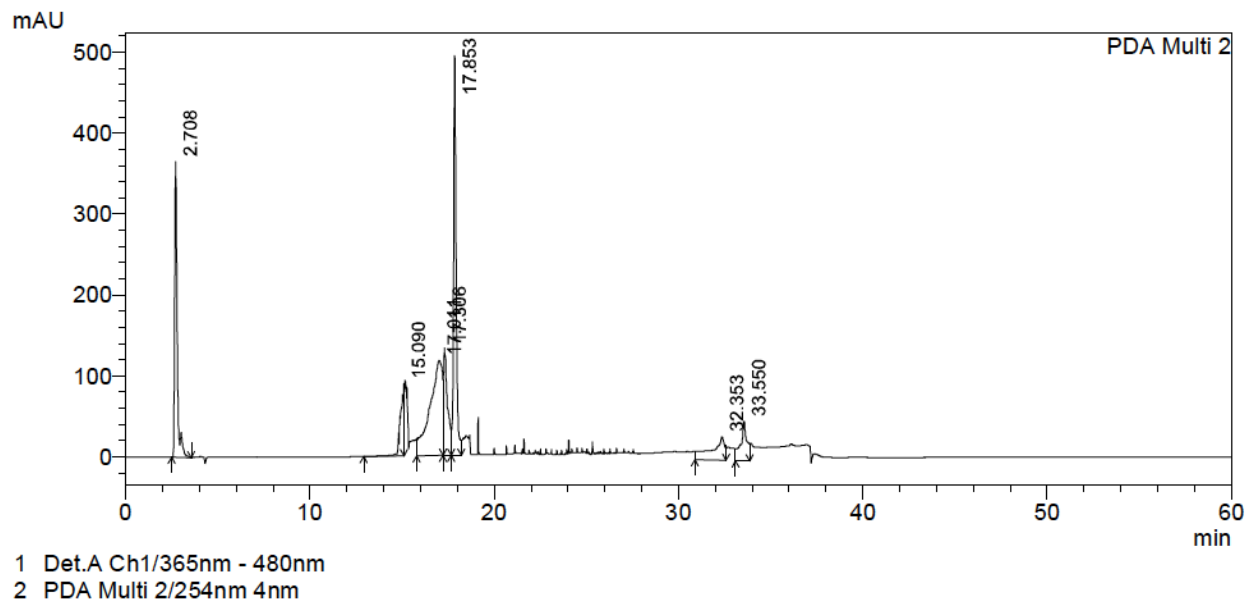

**SI-Figure 14.** HPLC trace for purified peptide 6.



## Target Compound Screening Report

|            |                                        |                 |                      |           |                      |
|------------|----------------------------------------|-----------------|----------------------|-----------|----------------------|
| Data File  | MSF14-2426(nCKDEW_KDYWECC)_hrESIpos3.d | Sample Name     | 2426(nCKDEW_KDYWECC) | Comment   | 2426(nCKDEW_KDYWECC) |
| Position   | P1-E1                                  | Instrument Name | Instrument 1         | User Name |                      |
| Acq Method | pos.m                                  | Acquired Time   | 9/11/2014 4:06:51 PM | DA Method | Ian.m                |

MS Zoomed Spectrum

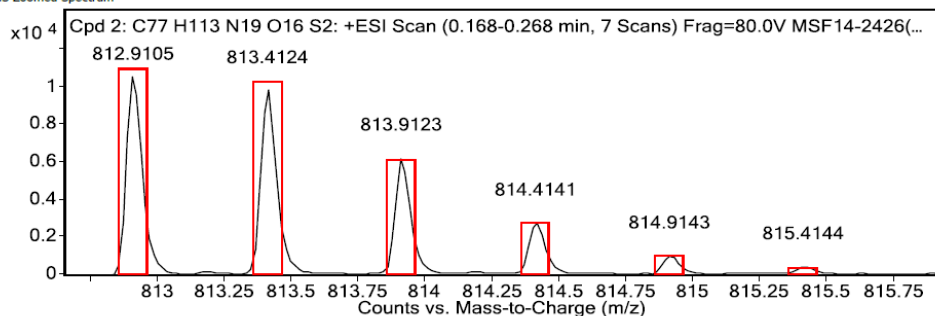

MS Spectrum Peak List

| Obs. m/z  | Calc. m/z | Charge | Abund     | Formula         | Ion/Isotope | Tgt Mass Error (ppm) |
|-----------|-----------|--------|-----------|-----------------|-------------|----------------------|
| 342.27890 |           |        | 487108.04 |                 |             |                      |
| 812.91050 | 812.91000 | 2      | 10702.85  | C77H113N19O16S2 | (M+2H)+2    | -0.65                |
| 813.41240 | 813.41140 | 2      | 9851.45   | C77H113N19O16S2 | (M+2H)+2    | -1.2                 |
| 813.91230 | 813.91200 | 2      | 6261.34   | C77H113N19O16S2 | (M+2H)+2    | -0.39                |
| 814.41410 | 814.41250 | 2      | 2794.08   | C77H113N19O16S2 | (M+2H)+2    | -1.9                 |
| 814.91430 | 814.91300 | 2      | 1043.97   | C77H113N19O16S2 | (M+2H)+2    | -1.58                |
| 815.41440 | 815.41350 | 2      | 468.78    | C77H113N19O16S2 | (M+2H)+2    | -1.06                |

--- End Of Report ---

## Target Compound Screening Report

|            |                                        |                 |                      |           |                      |
|------------|----------------------------------------|-----------------|----------------------|-----------|----------------------|
| Data File  | MSF14-2426(nCKDEW_KDYWECC)_hrESIneg1.d | Sample Name     | 2426(nCKDEW_KDYWECC) | Comment   | 2426(nCKDEW_KDYWECC) |
| Position   | P1-E1                                  | Instrument Name | Instrument 1         | User Name |                      |
| Acq Method | neg.m                                  | Acquired Time   | 9/11/2014 4:12:30 PM | DA Method | Ian.m                |

MS Zoomed Spectrum

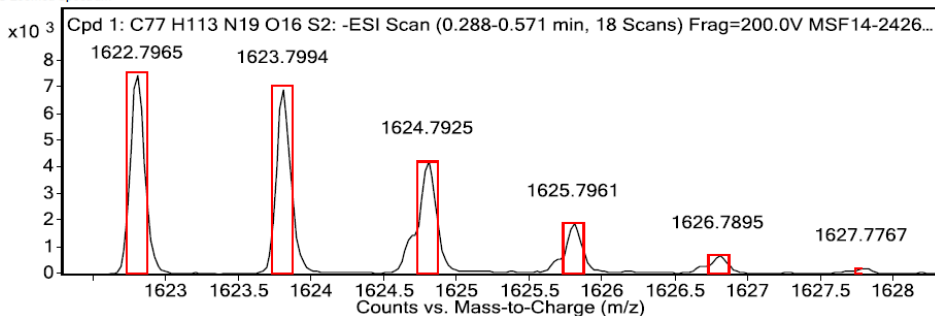

MS Spectrum Peak List

| Obs. m/z   | Calc. m/z  | Charge | Abund     | Formula         | Ion/Isotope | Tgt Mass Error (ppm) |
|------------|------------|--------|-----------|-----------------|-------------|----------------------|
| 248.96060  |            |        | 234543.08 |                 |             |                      |
| 1622.79650 | 1622.79810 | 1      | 7509.6    | C77H113N19O16S2 | (M-H)-      | 1.01                 |
| 1623.79940 | 1623.80100 | 1      | 6927.6    | C77H113N19O16S2 | (M-H)-      | 0.96                 |
| 1624.79250 | 1624.80220 | 1      | 4266.76   | C77H113N19O16S2 | (M-H)-      | 5.93                 |
| 1625.79610 | 1625.80320 | 1      | 1905.57   | C77H113N19O16S2 | (M-H)-      | 4.36                 |
| 1626.78950 | 1626.80420 | 1      | 710.54    | C77H113N19O16S2 | (M-H)-      | 9.05                 |
| 1627.77670 | 1627.80520 | 1      | 235.21    | C77H113N19O16S2 | (M-H)-      | 17.53                |

--- End Of Report ---

SI-Figure 15. High resolution mass spectrometry data for peptide 8.

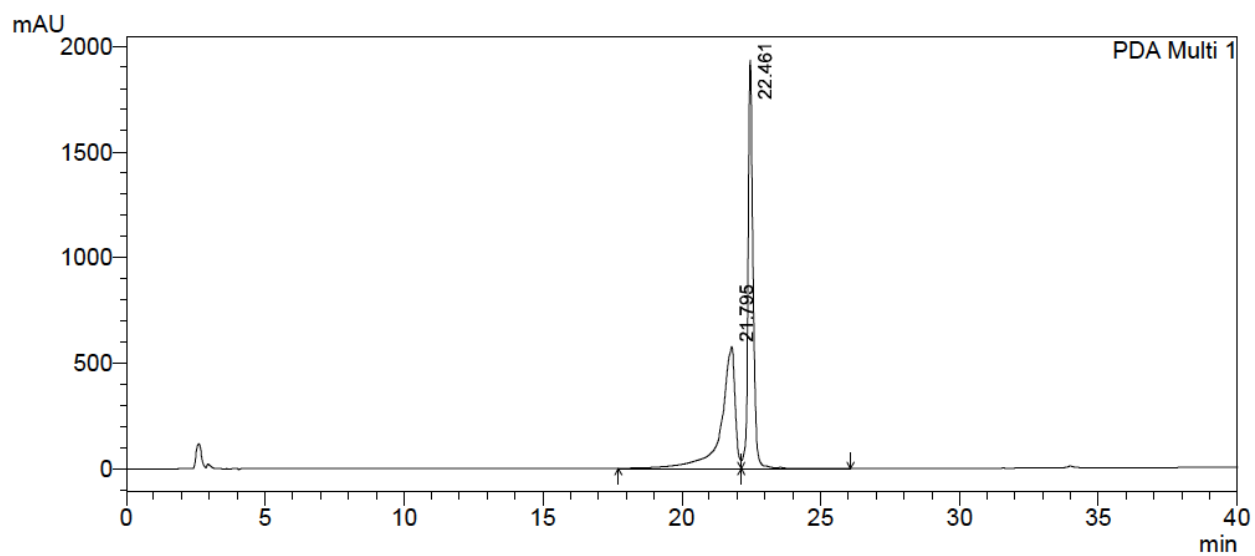

1 Det.A Ch1/365nm - 480nm  
2 PDA Multi 1/254nm 4nm

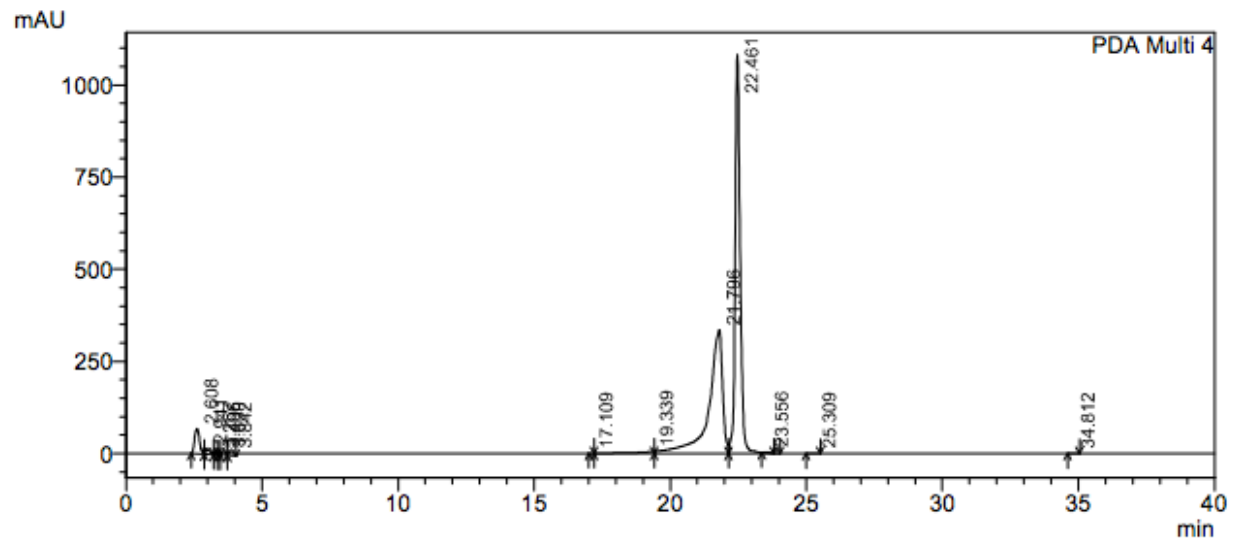

1 Det.A Ch1/365nm - 480nm  
2 PDA Multi 4/330nm 4nm

**SI-Figure 16.** HPLC trace for purified peptide 8.

## Target Compound Screening Report

|                                                                   |                                                 |                                             |
|-------------------------------------------------------------------|-------------------------------------------------|---------------------------------------------|
| Data File: MSF14-4477(nCKDEW_KDYWECC_isobutylamine)_hrES[post1].d | Sample Name: 4477(nCKDEW_KDYWECC_isobutylamine) | Comment: 4477(nCKDEW_KDYWECC_isobutylamine) |
| Position: P1-E4                                                   | Instrument Name: Instrument 1                   | User Name: Ian.m                            |
| Acq Method: pos.m                                                 | Acquired Time: 12/17/2014 1:17:46 PM            | DA Method: Ian.m                            |

MS Zoomed Spectrum

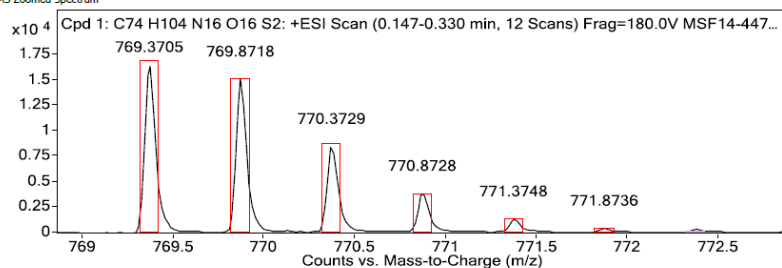

MS Spectrum Peak List

| Obs. m/z  | Calc. m/z | Charge | Abund    | Formula         | Ion/Isotope | Tgt Mass Error (ppm) |
|-----------|-----------|--------|----------|-----------------|-------------|----------------------|
| 769.37050 | 769.37020 | 2      | 16614.5  | C74H104N16O16S2 | (M+2H)+2    | -0.49                |
| 769.87180 | 769.87160 | 2      | 15109.76 | C74H104N16O16S2 | (M+2H)+2    | -0.23                |
| 770.37290 | 770.37220 | 2      | 8503.04  | C74H104N16O16S2 | (M+2H)+2    | -0.97                |
| 770.87280 | 770.87260 | 2      | 3884.32  | C74H104N16O16S2 | (M+2H)+2    | -0.18                |
| 771.37480 | 771.37310 | 2      | 1382.74  | C74H104N16O16S2 | (M+2H)+2    | -2.14                |
| 771.87360 | 771.87360 | 2      | 462.97   | C74H104N16O16S2 | (M+2H)+2    | 0.05                 |
| 780.36040 |           |        | 37856.99 |                 |             |                      |

--- End Of Report ---

## Target Compound Screening Report

|                                                                  |                                                 |                                             |
|------------------------------------------------------------------|-------------------------------------------------|---------------------------------------------|
| Data File: MSF14-4477(nCKDEW_KDYWECC_isobutylamine)_hrES[neg1].d | Sample Name: 4477(nCKDEW_KDYWECC_isobutylamine) | Comment: 4477(nCKDEW_KDYWECC_isobutylamine) |
| Position: P1-E4                                                  | Instrument Name: Instrument 1                   | User Name: Ian.m                            |
| Acq Method: neg.m                                                | Acquired Time: 12/17/2014 1:25:47 PM            | DA Method: Ian.m                            |

MS Zoomed Spectrum

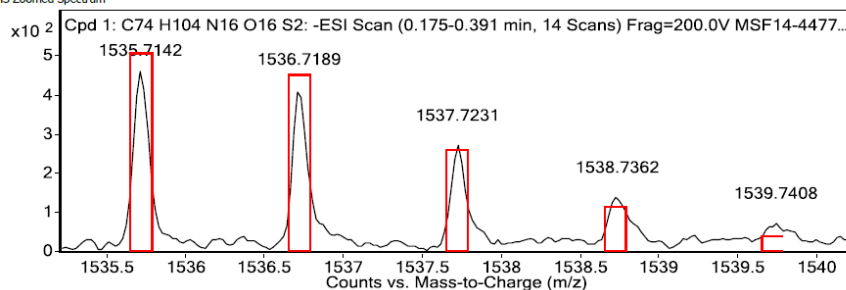

MS Spectrum Peak List

| Obs. m/z   | Calc. m/z  | Charge | Abund   | Formula         | Ion/Isotope | Tgt Mass Error (ppm) |
|------------|------------|--------|---------|-----------------|-------------|----------------------|
| 248.96000  |            |        | 64305.2 |                 |             |                      |
| 1535.71420 | 1535.71850 | 1      | 463.88  | C74H104N16O16S2 | (M-H)-      | 2.82                 |
| 1536.71890 | 1536.72140 | 1      | 417.47  | C74H104N16O16S2 | (M-H)-      | 1.61                 |
| 1537.72310 | 1537.72250 | 1      | 273.98  | C74H104N16O16S2 | (M-H)-      | -0.38                |
| 1538.73620 | 1538.72350 | 1      | 140.73  | C74H104N16O16S2 | (M-H)-      | -8.25                |
| 1539.74080 | 1539.72440 | 1      | 74.22   | C74H104N16O16S2 | (M-H)-      | -10.66               |

--- End Of Report ---

SI-Figure 17. High resolution mass spectrometry data for peptide 9.

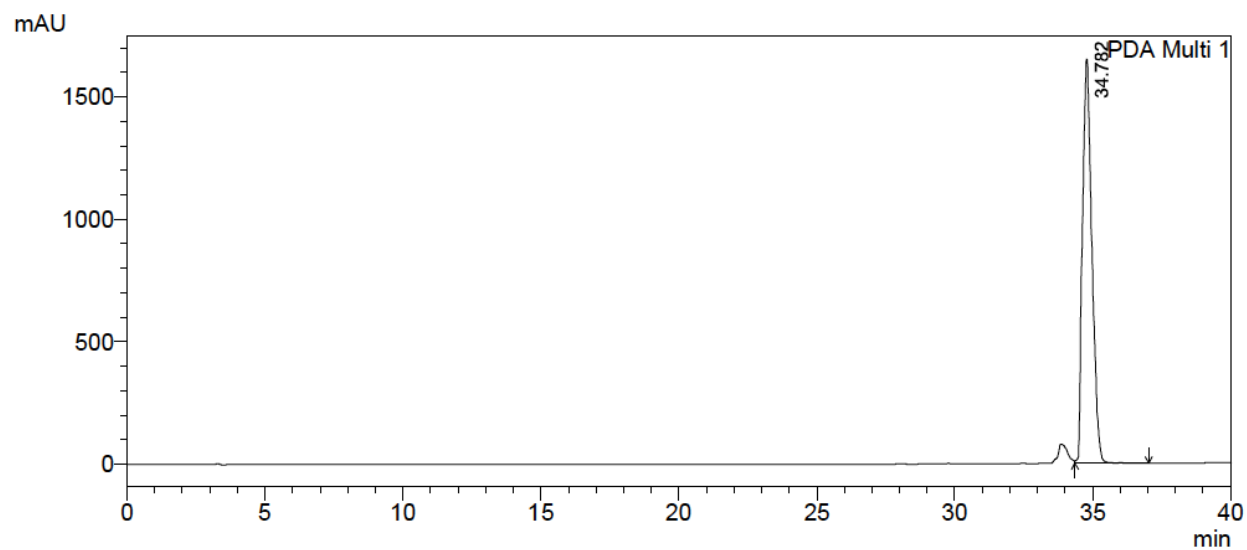

1 Det.A Ch1/365nm - 480nm  
 2 PDA Multi 1/254nm 4nm

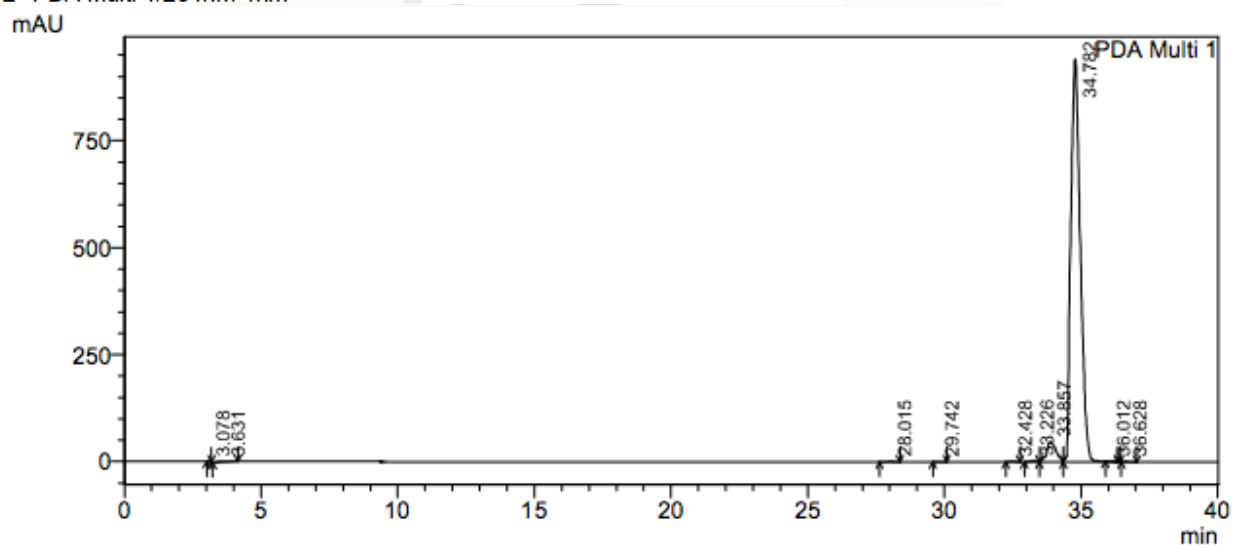

1 Det.A Ch1/365nm - 480nm  
 2 PDA Multi 1/330nm 4nm

**SI-Figure 18.** HPLC trace for purified peptide 9.

## Target Compound Screening Report

|            |                                           |                 |                         |           |                         |
|------------|-------------------------------------------|-----------------|-------------------------|-----------|-------------------------|
| Data File  | MSF14-2430(11-2-14_KDE_KDYWE)_hrESIpos3.d | Sample Name     | 2430(11-2-14_KDE_KDYWE) | Comment   | 2430(11-2-14_KDE_KDYWE) |
| Position   | P1-F6                                     | Instrument Name | Instrument 1            | User Name |                         |
| Acq Method | pos.m                                     | Acquired Time   | 11/13/2014 3:04:18 PM   | DA Method | Ian.m                   |

MS Zoomed Spectrum

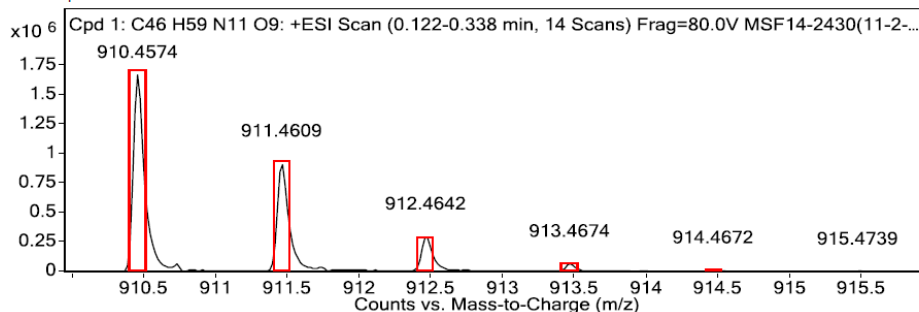

MS Spectrum Peak List

| Obs. m/z  | Calc. m/z | Charge | Abund      | Formula                                                        | Ion/Isotope        | Tgt Mass Error (ppm) |
|-----------|-----------|--------|------------|----------------------------------------------------------------|--------------------|----------------------|
| 455.73310 |           |        | 2158894.04 |                                                                |                    |                      |
| 910.45740 | 910.45700 | 1      | 1675021.78 | C <sub>46</sub> H <sub>59</sub> N <sub>11</sub> O <sub>9</sub> | (M+H) <sup>+</sup> | -0.41                |
| 911.46090 | 911.45990 | 1      | 921286.98  | C <sub>46</sub> H <sub>59</sub> N <sub>11</sub> O <sub>9</sub> | (M+H) <sup>+</sup> | -1.04                |
| 912.46420 | 912.46270 | 1      | 301557.87  | C <sub>46</sub> H <sub>59</sub> N <sub>11</sub> O <sub>9</sub> | (M+H) <sup>+</sup> | -1.68                |
| 913.46740 | 913.46530 | 1      | 68797.4    | C <sub>46</sub> H <sub>59</sub> N <sub>11</sub> O <sub>9</sub> | (M+H) <sup>+</sup> | -2.31                |
| 914.46720 | 914.46790 | 1      | 14291.77   | C <sub>46</sub> H <sub>59</sub> N <sub>11</sub> O <sub>9</sub> | (M+H) <sup>+</sup> | 0.73                 |
| 915.47390 | 915.47050 | 1      | 3706.55    | C <sub>46</sub> H <sub>59</sub> N <sub>11</sub> O <sub>9</sub> | (M+H) <sup>+</sup> | -3.76                |

--- End Of Report ---

## Target Compound Screening Report

|            |                                           |                 |                         |           |                         |
|------------|-------------------------------------------|-----------------|-------------------------|-----------|-------------------------|
| Data File  | MSF14-2430(11-2-14_KDE_KDYWE)_hrESIneg2.d | Sample Name     | 2430(11-2-14_KDE_KDYWE) | Comment   | 2430(11-2-14_KDE_KDYWE) |
| Position   | P1-F6                                     | Instrument Name | Instrument 1            | User Name |                         |
| Acq Method | neg.m                                     | Acquired Time   | 11/13/2014 3:08:03 PM   | DA Method | Ian.m                   |

MS Zoomed Spectrum

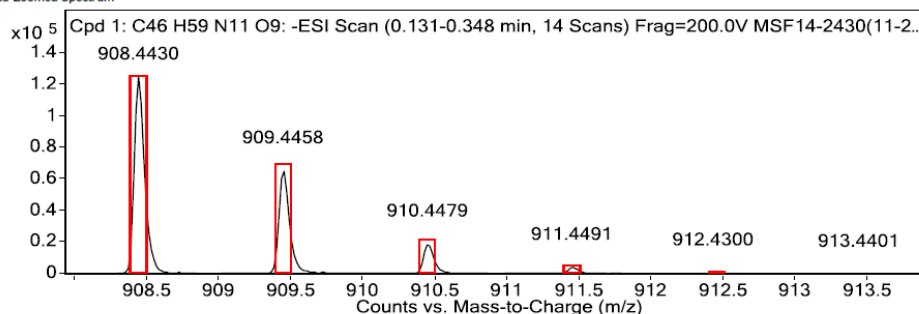

MS Spectrum Peak List

| Obs. m/z   | Calc. m/z | Charge | Abund     | Formula                                                        | Ion/Isotope        | Tgt Mass Error (ppm) |
|------------|-----------|--------|-----------|----------------------------------------------------------------|--------------------|----------------------|
| 908.44300  | 908.44240 | 1      | 125450.88 | C <sub>46</sub> H <sub>59</sub> N <sub>11</sub> O <sub>9</sub> | (M-H) <sup>-</sup> | -0.56                |
| 909.44580  | 909.44540 | 1      | 65993.42  | C <sub>46</sub> H <sub>59</sub> N <sub>11</sub> O <sub>9</sub> | (M-H) <sup>-</sup> | -0.47                |
| 910.44790  | 910.44810 | 1      | 19498.3   | C <sub>46</sub> H <sub>59</sub> N <sub>11</sub> O <sub>9</sub> | (M-H) <sup>-</sup> | 0.23                 |
| 911.44910  | 911.45080 | 1      | 4609.84   | C <sub>46</sub> H <sub>59</sub> N <sub>11</sub> O <sub>9</sub> | (M-H) <sup>-</sup> | 1.82                 |
| 912.43000  | 912.45340 | 1      | 1120.5    | C <sub>46</sub> H <sub>59</sub> N <sub>11</sub> O <sub>9</sub> | (M-H) <sup>-</sup> | 25.63                |
| 913.44010  | 913.45590 | 1      | 261.95    | C <sub>46</sub> H <sub>59</sub> N <sub>11</sub> O <sub>9</sub> | (M-H) <sup>-</sup> | 17.34                |
| 1022.43610 |           |        | 159301.06 |                                                                |                    |                      |

--- End Of Report ---

**SI-Figure 19.** High resolution mass spectrometry data for peptide 10.

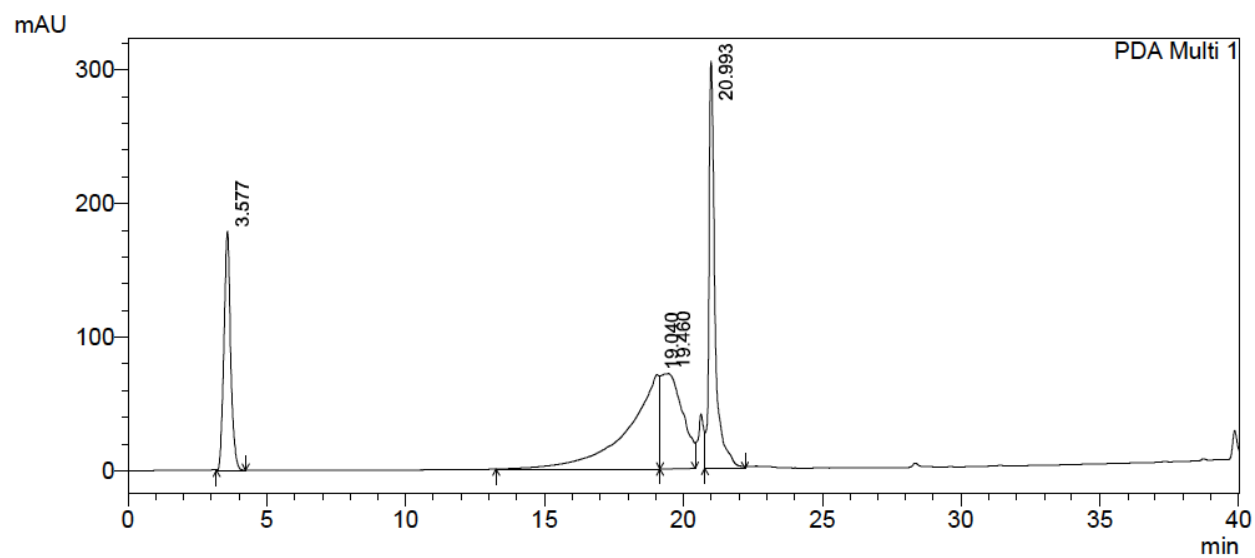

1 Det.A Ch1/365nm - 480nm

2 PDA Multi 1/254nm 4nm

**SI-Figure 20.** HPLC trace for purified peptide **10**.

## Target Compound Screening Report

|            |                                    |                 |                       |           |                  |
|------------|------------------------------------|-----------------|-----------------------|-----------|------------------|
| Data File  | MSF14-4475(KDEW_KDYWE)_hrESIpos2.d | Sample Name     | 4475(KDEW_KDYWE)      | Comment   | 4475(KDEW_KDYWE) |
| Position   | P1-B5                              | Instrument Name | Instrument 1          | User Name |                  |
| Acq Method | pos.m                              | Acquired Time   | 11/18/2014 9:26:15 AM | DA Method | Ian.m            |

MS Zoomed Spectrum

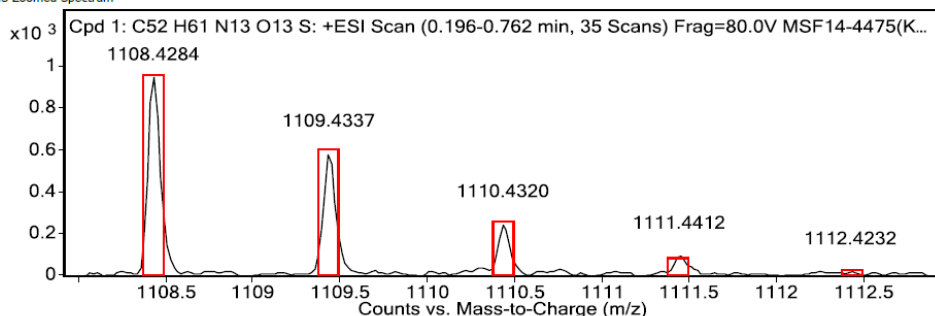

MS Spectrum Peak List

| Obs. m/z   | Calc. m/z  | Charge | Abund   | Formula       | Ion/Isotope | Tgt Mass Error (ppm) |
|------------|------------|--------|---------|---------------|-------------|----------------------|
| 554.71870  |            |        | 6263.03 |               |             |                      |
| 1108.42840 | 1108.43050 | 1      | 953.45  | C52H61N13O13S | (M+H)+      | 1.94                 |
| 1109.43370 | 1109.43340 | 1      | 586.36  | C52H61N13O13S | (M+H)+      | -0.24                |
| 1110.43200 | 1110.43440 | 1      | 248.59  | C52H61N13O13S | (M+H)+      | 2.2                  |
| 1111.44120 | 1111.43560 | 1      | 97.3    | C52H61N13O13S | (M+H)+      | -5.1                 |
| 1112.42320 | 1112.43690 | 1      | 21.73   | C52H61N13O13S | (M+H)+      | 12.36                |

--- End Of Report ---

## Target Compound Screening Report

|            |                                    |                 |                       |           |                  |
|------------|------------------------------------|-----------------|-----------------------|-----------|------------------|
| Data File  | MSF14-4475(KDEW_KDYWE)_hrESIneg2.d | Sample Name     | 4475(KDEW_KDYWE)      | Comment   | 4475(KDEW_KDYWE) |
| Position   | P1-B5                              | Instrument Name | Instrument 1          | User Name |                  |
| Acq Method | neg.m                              | Acquired Time   | 11/18/2014 9:23:11 AM | DA Method | Ian.m            |

MS Zoomed Spectrum

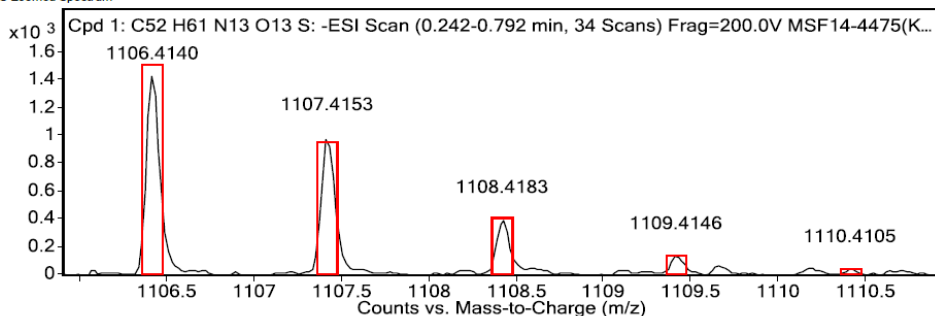

MS Spectrum Peak List

| Obs. m/z   | Calc. m/z  | Charge | Abund   | Formula       | Ion/Isotope | Tgt Mass Error (ppm) |
|------------|------------|--------|---------|---------------|-------------|----------------------|
| 979.96560  |            |        | 1505.41 |               |             |                      |
| 1106.41400 | 1106.41600 | 1      | 1434.94 | C52H61N13O13S | (M-H)-      | 1.76                 |
| 1107.41530 | 1107.41880 | 1      | 991.33  | C52H61N13O13S | (M-H)-      | 3.17                 |
| 1108.41830 | 1108.41990 | 1      | 396.96  | C52H61N13O13S | (M-H)-      | 1.44                 |
| 1109.41460 | 1109.42100 | 1      | 135.62  | C52H61N13O13S | (M-H)-      | 5.74                 |
| 1110.41050 | 1110.42240 | 1      | 42.51   | C52H61N13O13S | (M-H)-      | 10.67                |

--- End Of Report ---

**SI-Figure 21.** High resolution mass spectrometry data for peptide 11.

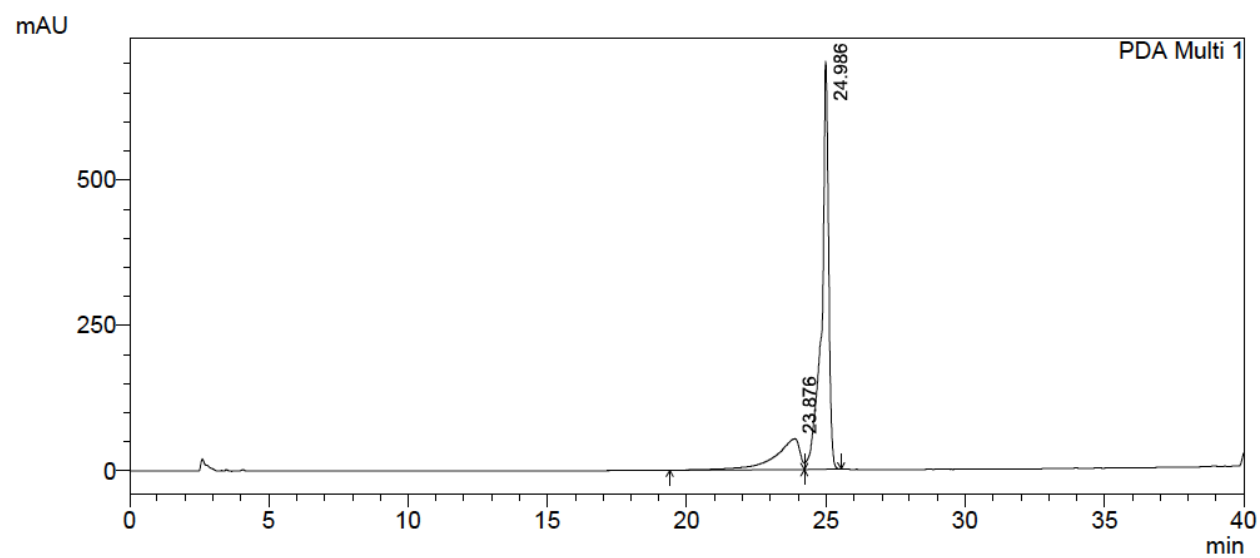

1 Det.A Ch1/365nm - 480nm  
2 PDA Multi 1/254nm 4nm

**SI-Figure 22.** HPLC trace for purified peptide 11.



## Target Compound Screening Report

|            |                                     |                 |                       |
|------------|-------------------------------------|-----------------|-----------------------|
| Data File  | MSF14-4476(KDEW_KDYWEc)_hrESIpos1.d | Sample Name     | 4476(KDEW_KDYWEc)     |
| Position   | P1-B5                               | Instrument Name | Instrument 1          |
| Acq Method | pos.m                               | Acquired Time   | 12/16/2014 8:02:31 AM |
|            |                                     | Comment         | 4476(KDEW_KDYWEc)     |
|            |                                     | User Name       | Ian.m                 |
|            |                                     | DA Method       | Ian.m                 |

### MS Zoomed Spectrum

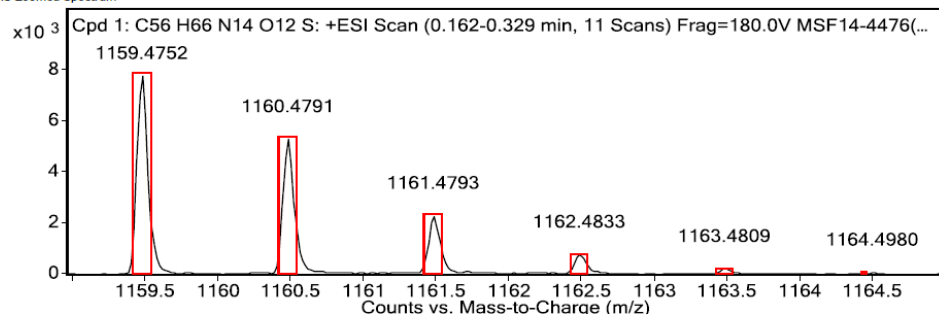

### MS Spectrum Peak List

| Obs. m/z   | Calc. m/z  | Charge | Abund    | Formula       | Ion/Isotope | Tgt Mass Error (ppm) |
|------------|------------|--------|----------|---------------|-------------|----------------------|
| 580.24270  |            |        | 21918.24 |               |             |                      |
| 1159.47520 | 1159.47780 | 1      | 7795.29  | C56H66N14O12S | (M+H)+      | 2.24                 |
| 1160.47910 | 1160.48070 | 1      | 5294.49  | C56H66N14O12S | (M+H)+      | 1.38                 |
| 1161.47930 | 1161.48190 | 1      | 2299.1   | C56H66N14O12S | (M+H)+      | 2.27                 |
| 1162.48330 | 1162.48310 | 1      | 780.91   | C56H66N14O12S | (M+H)+      | -0.18                |
| 1163.48090 | 1163.48440 | 1      | 221.77   | C56H66N14O12S | (M+H)+      | 3.06                 |
| 1164.49800 | 1164.48600 | 1      | 78.18    | C56H66N14O12S | (M+H)+      | -10.3                |

--- End Of Report ---

## Target Compound Screening Report

|            |                                     |                 |                       |
|------------|-------------------------------------|-----------------|-----------------------|
| Data File  | MSF14-4476(KDEW_KDYWEc)_hrESIneg1.d | Sample Name     | 4476(KDEW_KDYWEc)     |
| Position   | P1-B5                               | Instrument Name | Instrument 1          |
| Acq Method | neg.m                               | Acquired Time   | 12/16/2014 8:05:08 AM |
|            |                                     | Comment         | 4476(KDEW_KDYWEc)     |
|            |                                     | User Name       | Ian.m                 |
|            |                                     | DA Method       | Ian.m                 |

### MS Zoomed Spectrum

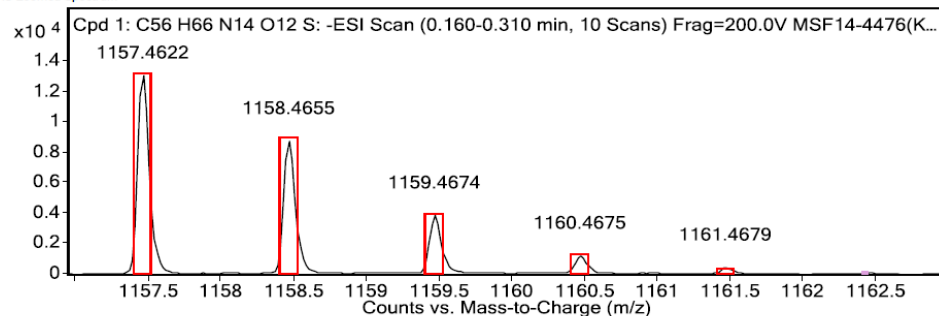

### MS Spectrum Peak List

| Obs. m/z   | Calc. m/z  | Charge | Abund    | Formula       | Ion/Isotope | Tgt Mass Error (ppm) |
|------------|------------|--------|----------|---------------|-------------|----------------------|
| 112.98560  |            |        | 19732.4  |               |             |                      |
| 1157.46220 | 1157.46330 | 1      | 13140.28 | C56H66N14O12S | (M-H)-      | 0.9                  |
| 1158.46550 | 1158.46610 | 1      | 8800.68  | C56H66N14O12S | (M-H)-      | 0.56                 |
| 1159.46740 | 1159.46740 | 1      | 3897.37  | C56H66N14O12S | (M-H)-      | 0                    |
| 1160.46750 | 1160.46850 | 1      | 1237.52  | C56H66N14O12S | (M-H)-      | 0.9                  |
| 1161.46790 | 1161.46990 | 1      | 464.1    | C56H66N14O12S | (M-H)-      | 1.66                 |

--- End Of Report ---

**SI-Figure 23.** High resolution mass spectrometry data for peptide 12.

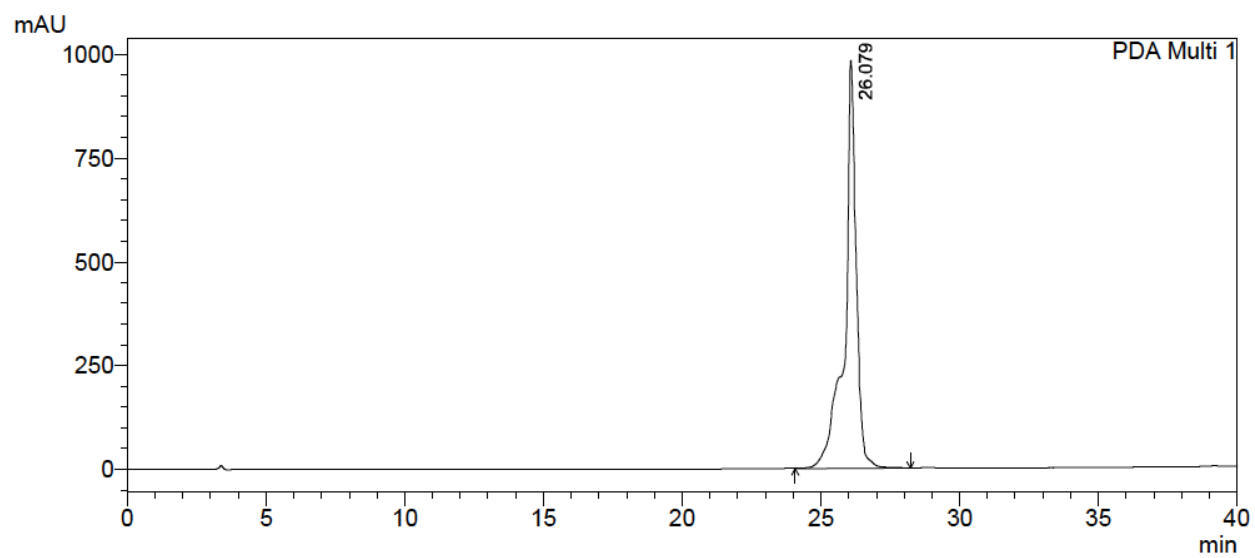

1 Det.A Ch1/365nm - 480nm

2 PDA Multi 1/254nm 4nm

**SI-Figure 24.** HPLC trace for purified peptide **12**.
